# Supplementary material for: Sulfur-doped CoFe2O4 nanopowders for enhanced visible-light photocatalytic activity and magnetic properties
Source: Royal Society of Chemistry journal article supplement (doi:10.1039/c7ra10016g), 2017-01-01
Supplement: c7ra10016g1.pdf [file c7ra10016g1.pdf]

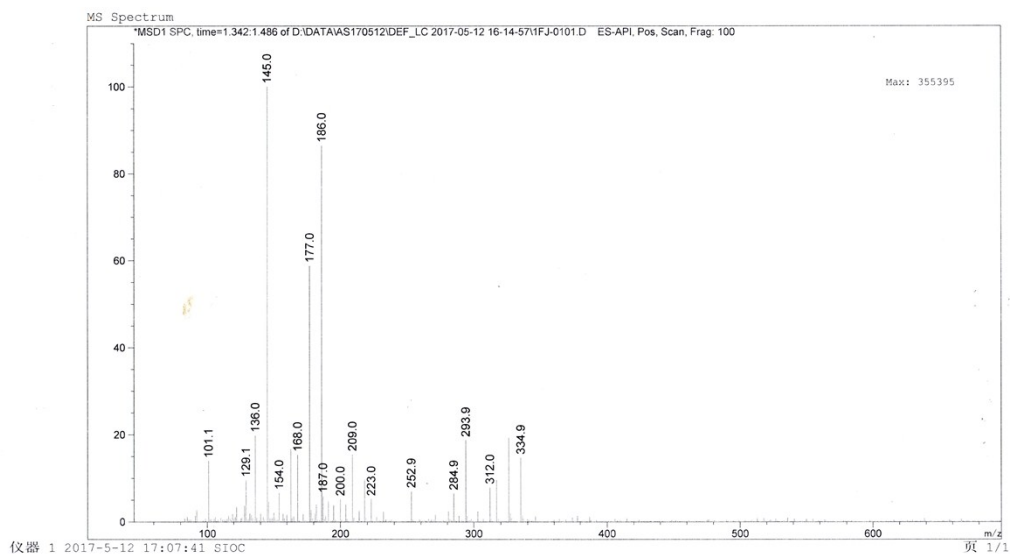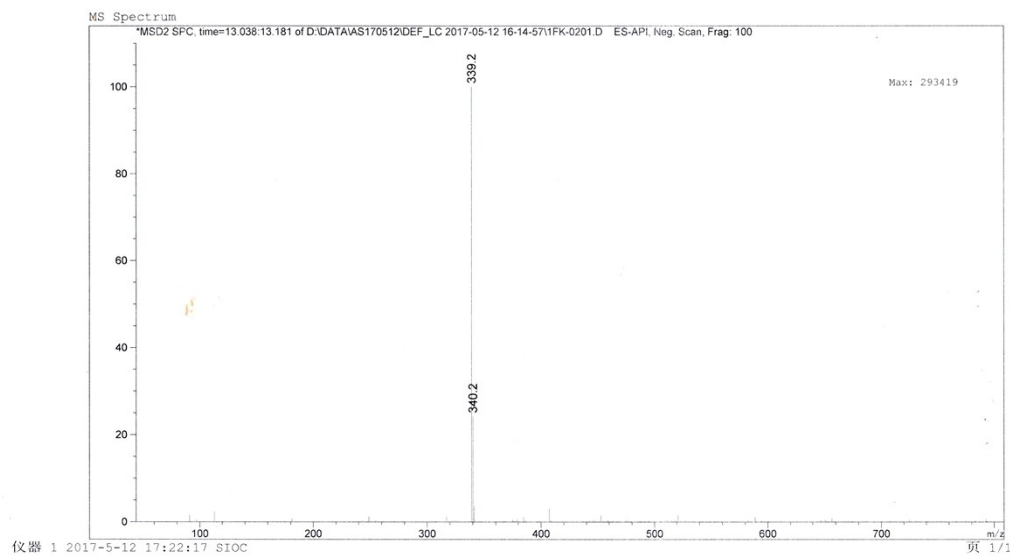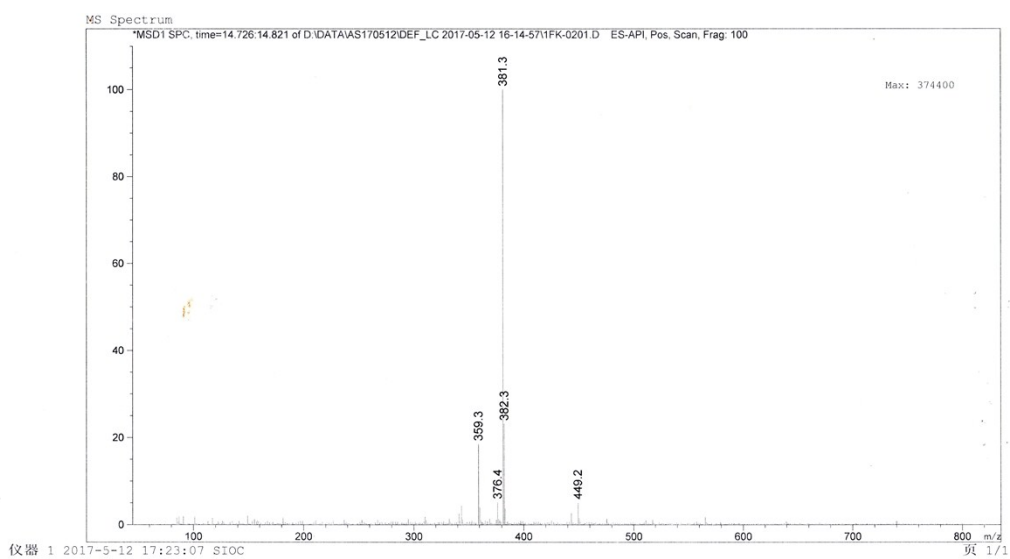

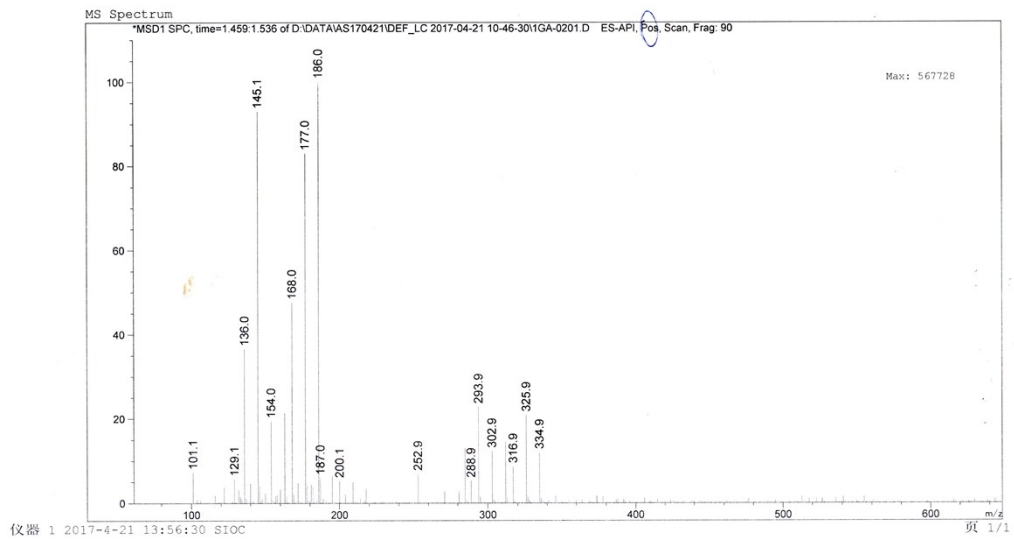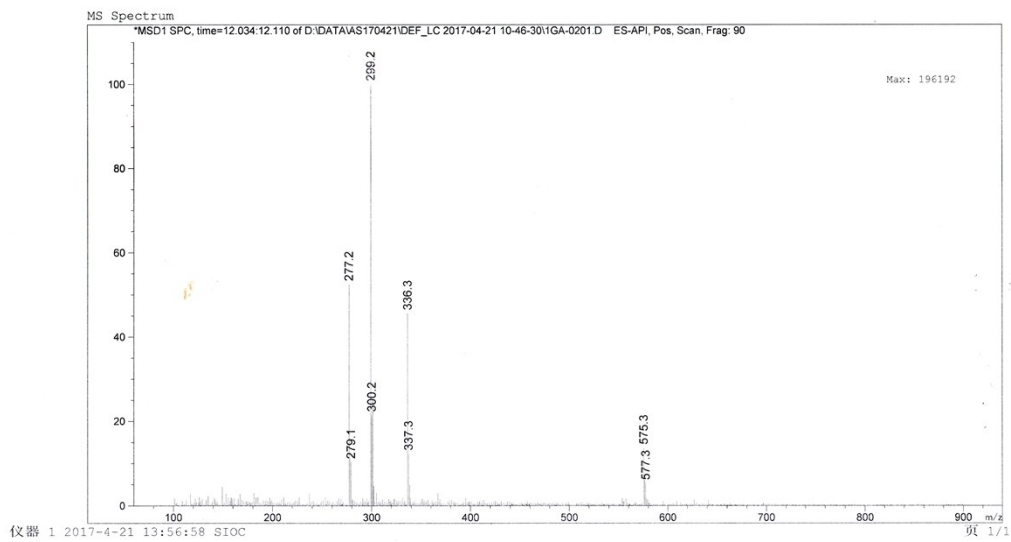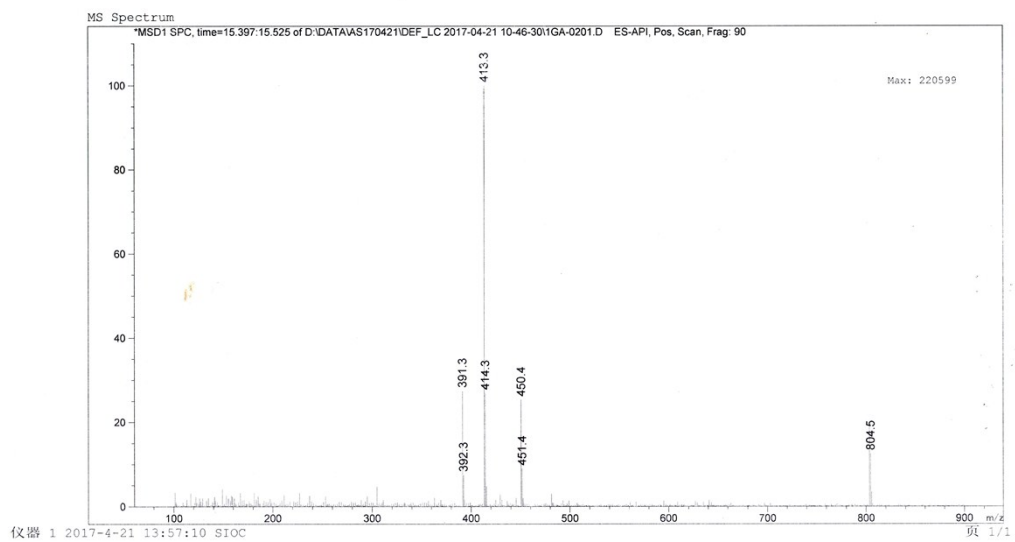

Fig. S1. Product ions spectra of OTC photocatalysis sample before and after 1 h , 3 h and 5 h under vis irradiation (OTC: 60 mg/L, pH = 8.5).
